# Supplementary material
Source: MDPI journal article supplement (https://www.mdpi.com/2072-4292/15/12/3178)
Supplement: s1 [file s1]

## Supplementary Materials

**Table S1.** The study area and the covering countries around continents

| Continents    | Dryland areas ( $\times 10^4$ km <sup>2</sup> ) | Countries | Dryland areas ( $\times 10^4$ km <sup>2</sup> ) (excluded countries with dryland area less than 0.02 million km <sup>2</sup> ) | Countries (excluded countries with dryland area less than 0.02 million km <sup>2</sup> ) |
|---------------|-------------------------------------------------|-----------|--------------------------------------------------------------------------------------------------------------------------------|------------------------------------------------------------------------------------------|
| Asia          | 1445.9                                          | 29        | 1441.4                                                                                                                         | 20                                                                                       |
| Africa        | 1534.2                                          | 41        | 1528.6                                                                                                                         | 29                                                                                       |
| South America | 246.3                                           | 13        | 244.6                                                                                                                          | 8                                                                                        |
| North America | 339.5                                           | 8         | 338.4                                                                                                                          | 3                                                                                        |
| Europe        | 23.8                                            | 4         | 22.4                                                                                                                           | 1                                                                                        |
| Oceania       | 538.7                                           | 2         | 538.7                                                                                                                          | 1                                                                                        |
| Global        | 4128.4                                          | 97        | 4114.1                                                                                                                         | 62                                                                                       |

**Table S2.** The 37 land cover categories in CCILI dataset and their re-groups

| Regrouped land covers | Ecological level | Land cover categories in LCCS system                                                                   |
|-----------------------|------------------|--------------------------------------------------------------------------------------------------------|
| Farmland              | 5                | Cropland, rainfed                                                                                      |
|                       |                  | Cropland, rainfed-Herbaceous cover                                                                     |
|                       |                  | Cropland, rainfed-Tree or shrub cover                                                                  |
|                       |                  | Cropland, irrigated or post-flooding                                                                   |
|                       |                  | Mosaic cropland (>50%) / natural vegetation (tree, shrub, herbaceous cover) (<50%)                     |
|                       |                  | Mosaic natural vegetation (tree, shrub, herbaceous cover) (>50%) / cropland (<50%)                     |
| Forest                | 2                | Tree cover, broadleaved, evergreen, closed to open (>15%)                                              |
|                       |                  | Tree cover, broadleaved, deciduous, closed to open (>15%)                                              |
|                       |                  | Tree cover, broadleaved, deciduous, closed to open (>15%)-Tree cover, broadleaved, deciduous, closed   |
|                       |                  | Tree cover, broadleaved, deciduous, closed to open (>15%)-Tree cover, broadleaved, deciduous, open     |
|                       |                  | Tree cover, needleleaved, evergreen, closed to open (>15%)                                             |
|                       |                  | Tree cover, needleleaved, evergreen, closed to open (>15%)-Tree cover, needleleaved, evergreen, closed |

|            |   |                                                                                                                                                                                                                                                                                                                                                                                                                                                                                                                                                                                                                             |
|------------|---|-----------------------------------------------------------------------------------------------------------------------------------------------------------------------------------------------------------------------------------------------------------------------------------------------------------------------------------------------------------------------------------------------------------------------------------------------------------------------------------------------------------------------------------------------------------------------------------------------------------------------------|
|            |   | (>40%)<br>Tree cover, needleleaved, evergreen, closed to open (>15%)-Tree cover, needleleaved, evergreen, open (15~40%)<br>Tree cover, needleleaved, deciduous, closed to open (>15%)<br>Tree cover, needleleaved, deciduous, closed to open (>15%)-Tree cover, needleleaved, deciduous, closed (>40%)<br>Tree cover, needleleaved, deciduous, closed to open (>15%)-Tree cover, needleleaved, deciduous, open<br>Tree cover, mixed leaf type (broadleaved and needleleaved)<br>Mosaic tree and shrub (>50%) / herbaceous cover (<50%)<br>Tree cover, flooded, fresh or brackish water<br>Tree cover, flooded, saline water |
| Grassland  | 4 | Mosaic herbaceous cover (>50%) / tree and shrub (<50%)<br>Grassland                                                                                                                                                                                                                                                                                                                                                                                                                                                                                                                                                         |
| Shrub      | 3 | Shrubland<br>Shrubland-Evergreen shrubland<br>Shrubland-Deciduous shrubland                                                                                                                                                                                                                                                                                                                                                                                                                                                                                                                                                 |
| Wetland    | 1 | Shrub or herbaceous cover, flooded, fresh/saline/brackish water<br>Water bodies                                                                                                                                                                                                                                                                                                                                                                                                                                                                                                                                             |
| Urban area | 5 | Urban areas                                                                                                                                                                                                                                                                                                                                                                                                                                                                                                                                                                                                                 |
| Bare       | 5 | Bare areas<br>Bare areas-Consolidated bare areas<br>Bare areas-Unconsolidated bare areas                                                                                                                                                                                                                                                                                                                                                                                                                                                                                                                                    |
| Others     | 5 | Lichens and mosses<br>Sparse vegetation (tree, shrub, herbaceous cover) (<15%)<br>Sparse vegetation (tree, shrub, herbaceous cover) (<15%)-Sparse tree (<15%)<br>Sparse vegetation (tree, shrub, herbaceous cover) (<15%)-Sparse shrub (<15%)<br>Sparse vegetation (tree, shrub, herbaceous cover) (<15%)-Sparse herbaceous cover (<15%)<br>Permanent snow and ice                                                                                                                                                                                                                                                          |

**Table S3.** The transition matrix (%) of eight land cover categories (1992–2020)

| 1992\2020  | Farmland | Forest | Grassland | Shrub | Wetland | Urban area | Bare | Others |
|------------|----------|--------|-----------|-------|---------|------------|------|--------|
| Farmland   | -        | 1.98   | 2.14      | 0.59  | 0.10    | 1.84       | 0.45 | 0.54   |
| Forest     | 1.68     | -      | 1.38      | 3.71  | 0.20    | 0.07       | 0.10 | 0.44   |
| Grassland  | 6.02     | 1.88   | -         | 0.50  | 0.14    | 0.57       | 2.71 | 9.02   |
| Shrub      | 2.95     | 4.38   | 1.14      | -     | 0.05    | 0.51       | 0.22 | 0.42   |
| Wetland    | 0.10     | 0.20   | 0.13      | 0.05  | -       | 0.02       | 1.91 | 0.11   |
| Urban area | 0.00     | 0.00   | 0.00      | 0.00  | 0.00    | -          | 0.00 | 0.00   |
| Bare       | 2.09     | 0.05   | 9.09      | 0.03  | 0.30    | 0.51       | -    | 15.19  |
| Others     | 3.36     | 0.51   | 15.28     | 0.17  | 0.05    | 0.14       | 5.00 | -      |

**Table S4.** The CRs in 37 land cover categories (1992–2020)

| 37 original land cover categories in LCCS system                                                            | Percentage<br>in 1992(%) | Percentage<br>in 2020(%) | CR<br>(%) |
|-------------------------------------------------------------------------------------------------------------|--------------------------|--------------------------|-----------|
| Cropland, rainfed                                                                                           | 3.93                     | 3.98                     | 1.42      |
| Cropland, rainfed-Herbaceous cover                                                                          | 2.83                     | 3.04                     | 7.65      |
| Cropland, rainfed-Tree or shrub cover                                                                       | 0.08                     | 0.08                     | 2.82      |
| Cropland, irrigated or post-flooding                                                                        | 1.92                     | 2.01                     | 4.94      |
| Mosaic cropland (>50%) / natural vegetation (tree, shrub, herbaceous cover) (<50%)                          | 1.18                     | 1.26                     | 6.21      |
| Mosaic natural vegetation (tree, shrub, herbaceous cover) (>50%) / cropland (<50%)                          | 1.34                     | 1.33                     | -0.49     |
| Tree cover, broadleaved, evergreen, closed to open (>15%)                                                   | 0.29                     | 0.30                     | 4.07      |
| Tree cover, broadleaved, deciduous, closed to open (>15%)                                                   | 0.76                     | 0.73                     | -3.19     |
| Tree cover, broadleaved, deciduous, closed to open (>15%)-Tree cover, broadleaved, deciduous, closed (>40%) | 0.18                     | 0.17                     | -4.75     |

|                                                                                                               |          |          |        |
|---------------------------------------------------------------------------------------------------------------|----------|----------|--------|
| Tree cover, broadleaved, deciduous, closed to open (>15%)-Tree cover, broadleaved, deciduous, open (15~40%)   | 1.01     | 1.03     | 1.84   |
| Tree cover, needleleaved, evergreen, closed to open (>15%)                                                    | 0.72     | 0.70     | -1.67  |
| Tree cover, needleleaved, evergreen, closed to open (>15%)-Tree cover, needleleaved, evergreen, closed (>40%) | 0.04     | 0.04     | -4.82  |
| Tree cover, needleleaved, evergreen, closed to open (>15%)-Tree cover, needleleaved, evergreen, open (15~40%) | 0.00     | 0.00     | 0.00   |
| Tree cover, needleleaved, deciduous, closed to open (>15%)                                                    | 0.10     | 0.11     | 16.17  |
| Tree cover, needleleaved, deciduous, closed to open (>15%)-Tree cover, needleleaved, deciduous, closed (>40%) | 0.00     | 0.00     | 0.00   |
| Tree cover, needleleaved, deciduous, closed to open (>15%)-Tree cover, needleleaved, deciduous, open (15~40%) | 0.00     | 0.00     | 0.00   |
| Tree cover, mixed leaf type (broadleaved and needleleaved)                                                    | 0.15     | 0.15     | -1.31  |
| Mosaic tree and shrub (>50%) / herbaceous cover (<50%)                                                        | 1.17     | 1.24     | 6.08   |
| Mosaic herbaceous cover (>50%) / tree and shrub (<50%)                                                        | 0.73     | 0.69     | -4.76  |
| Shrubland                                                                                                     | 13.37    | 13.15    | -1.63  |
| Shrubland-Evergreen shrubland                                                                                 | 0.00     | 0.00     | 4.42   |
| Shrubland-Deciduous shrubland                                                                                 | 1.76     | 1.74     | -0.94  |
| Grassland                                                                                                     | 13.27    | 13.73    | 3.44   |
| Lichens and mosses                                                                                            | 0.001206 | 0.001201 | -0.38  |
| Sparse vegetation (tree, shrub, herbaceous cover) (<15%)                                                      | 11.96    | 12.13    | 1.39   |
| Sparse vegetation (tree, shrub, herbaceous cover) (<15%)-Sparse tree (<15%)                                   | 0.00     | 0.00     | 1.56   |
| Sparse vegetation (tree, shrub, herbaceous cover) (<15%)-Sparse shrub (<15%)                                  | 0.09     | 0.08     | -8.78  |
| Sparse vegetation (tree, shrub, herbaceous cover) (<15%)-Sparse herbaceous cover (<15%)                       | 0.67     | 0.57     | -14.46 |
| Tree cover, flooded, fresh or brackish water                                                                  | 0.01     | 0.01     | 7.91   |
| Tree cover, flooded, saline water                                                                             | 0.02     | 0.03     | 10.72  |
| Shrub or herbaceous cover, flooded, fresh/saline/brackish water                                               | 0.53     | 0.53     | 0.42   |
| Urban areas                                                                                                   | 0.08     | 0.27     | 228.18 |
| Bare areas                                                                                                    | 40.65    | 39.79    | -2.11  |
| Bare areas-Consolidated bare areas                                                                            | 0.17     | 0.17     | -1.16  |
| Bare areas-Unconsolidated bare areas                                                                          | 0.21     | 0.22     | 2.50   |
| Water bodies                                                                                                  | 0.61     | 0.53     | -14.20 |
| Permanent snow and ice                                                                                        | 0.17     | 0.17     | 0.00   |

**Table S5.** Top eight land cover transitions from 1992 to 2020(%)

| Land cover transitions                                                                                                                              | Percentage (%) |
|-----------------------------------------------------------------------------------------------------------------------------------------------------|----------------|
| Bare areas -> Sparse vegetation (tree, shrub, herbaceous cover) (<15%)                                                                              | 13.91          |
| Sparse vegetation (tree, shrub, herbaceous cover) (<15%) -> Grassland                                                                               | 13.81          |
| Bare areas -> Grassland                                                                                                                             | 8.47           |
| Grassland -> Sparse vegetation (tree, shrub, herbaceous cover) (<15%)                                                                               | 7.78           |
| Sparse vegetation (tree, shrub, herbaceous cover) (<15%) -> Bare areas                                                                              | 4.67           |
| Grassland -> Bare areas                                                                                                                             | 2.29           |
| Sparse vegetation (tree, shrub, herbaceous cover) (<15%)-Sparse herbaceous cover (<15%) -> Sparse vegetation (tree, shrub, herbaceous cover) (<15%) | 2.26           |
| Water bodies -> Bare areas                                                                                                                          | 1.73           |

**Table S6.** Net change areas ( $\times 10^4$  km<sup>2</sup>) of 8 land cover categories in continents

| Land covers | Asia   | Africa | South America | North America | Europe | Oceania | Global |
|-------------|--------|--------|---------------|---------------|--------|---------|--------|
| Farmland    | 8.74   | 8.07   | 1.40          | 1.98          | -0.13  | 2.22    | 22.29  |
| Forest      | 0.66   | 3.84   | -3.30         | -0.07         | 0.19   | 2.35    | 3.66   |
| Grassland   | 10.45  | -0.71  | 0.57          | -1.48         | -0.03  | 12.78   | 21.58  |
| Shrub       | -0.57  | -5.26  | 1.39          | -2.45         | 0.00   | -5.13   | -12.01 |
| Wetland     | -4.38  | 0.12   | -0.04         | 0.00          | 0.04   | -0.10   | -4.36  |
| Urban area  | 5.54   | 1.33   | 0.39          | 1.89          | 0.28   | 0.05    | 9.49   |
| Bare        | -22.66 | -14.39 | -2.30         | 0.08          | -0.03  | -4.50   | -43.79 |
| Others      | 2.22   | 6.98   | 1.90          | 0.05          | -0.33  | -7.69   | 3.14   |

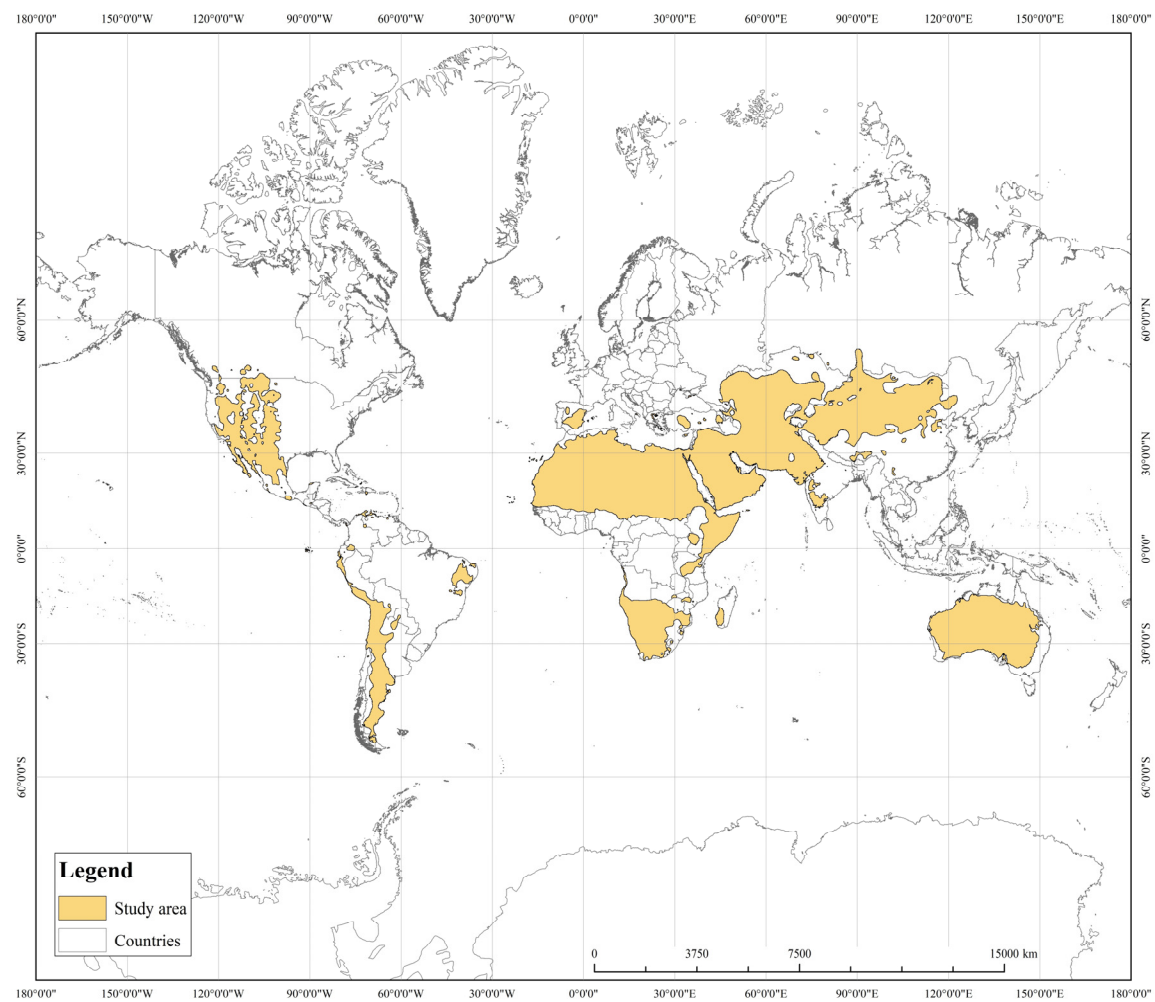

**Figure S1.** The study area
